# Supplementary material for: Periodontal Status among women with Polycystic Ovary Syndrome based on medical treatment: A Cross-sectional study
Source: Research Square preprint supplement (doi:10.21203/rs.3.rs-8665838/v1), 2026-02-12
Supplement: Supplementary file 1 [file b24f011dd2f54712ae856b0d.docx]

1. Dr. Jagadeeswara Rao Sukhabogi

Professor and HOD

Department of Public Health Dentistry

Government Dental College & Hospital, Hyderabad

India

[jrsukhabogi@yahoo.com](mailto:jrsukhabogi@yahoo.com)

2. Dr. Dolar Doshi

Associate Professor

Department of Public Health Dentistry

Government Dental College & Hospital, Hyderabad

India

[doshidolar@yahoo.com](mailto:doshidolar@yahoo.com)

3. Dr Marzia Shamila Iqbal

Senior Resident

Department of Public Health Dentistry

Government Dental College & Hospital, Hyderabad

India

marziashamila@gmail.com

4. Dr. Jummala Sasikala

Senior Resident

Department of Public Health Dentistry

Government Dental College & Hospital, Hyderabad

India

sasikala.j9@gmail.com

Address of the Corresponding Author:

Dr. Jummala Sasikala

Senior Resident

Room No 311

Department of Public Health Dentistry

Government Dental College and Hospital, Hyderabad

Telangana, India, 500012

Phone number- +918790048567

Email id- [sasikala.j9@gmail.com](mailto:sasikala.j9@gmail.com)
